# Supplementary material for: Optical readout of charge carriers stored in a 2D memory cell of monolayer WSe2
Source: Royal Society of Chemistry journal article supplement (doi:10.1039/d3nr04263d), 2024-01-01
Supplement: d3nr04263d1.pdf [file d3nr04263d1.pdf]

## Electronic Supplementary Information

### Optical Readout of Charge Carriers Stored in a 2D Memory Cell of Monolayer WSe<sub>2</sub>

Si Li<sup>1†</sup>, Kan Liao<sup>1,2†</sup>, Yanfeng Bi<sup>1</sup>, Ke Ding<sup>1</sup>, Encheng Sun<sup>1</sup>, Chunfeng Zhang<sup>1</sup>, Lin Wang<sup>2\*</sup>,  
Fengrui Hu<sup>3\*</sup>, Min Xiao<sup>1,4\*</sup>, and Xiaoyong Wang<sup>1\*</sup>

*<sup>1</sup>National Laboratory of Solid State Microstructures, School of Physics, and Collaborative Innovation Center of Advanced Microstructures, Nanjing University, Nanjing 210093, China*

*<sup>2</sup>School of Flexible Electronics (Future Technologies) & Institute of Advanced Materials (IAM), Key Laboratory of Flexible Electronics (KLOFE), and Jiangsu National Synergetic Innovation Center for Advanced Materials (SICAM), Nanjing Tech University (NanjingTech), Nanjing 211816, China*

*<sup>3</sup>College of Engineering and Applied Sciences, and MOE Key Laboratory of Intelligent Optical Sensing and Manipulation, Nanjing University, Nanjing 210093, China*

*<sup>4</sup>Department of Physics, University of Arkansas, Fayetteville, Arkansas 72701, USA*

<sup>†</sup>These authors contributed equally to this work

\*Correspondence to L.W. ([iamlwang@njtech.edu.cn](mailto:iamlwang@njtech.edu.cn)), F.H. ([frhu@nju.edu.cn](mailto:frhu@nju.edu.cn)), M.X. ([mxiao@uark.edu](mailto:mxiao@uark.edu)) or X.W. ([wxiaoyong@nju.edu.cn](mailto:wxiaoyong@nju.edu.cn))

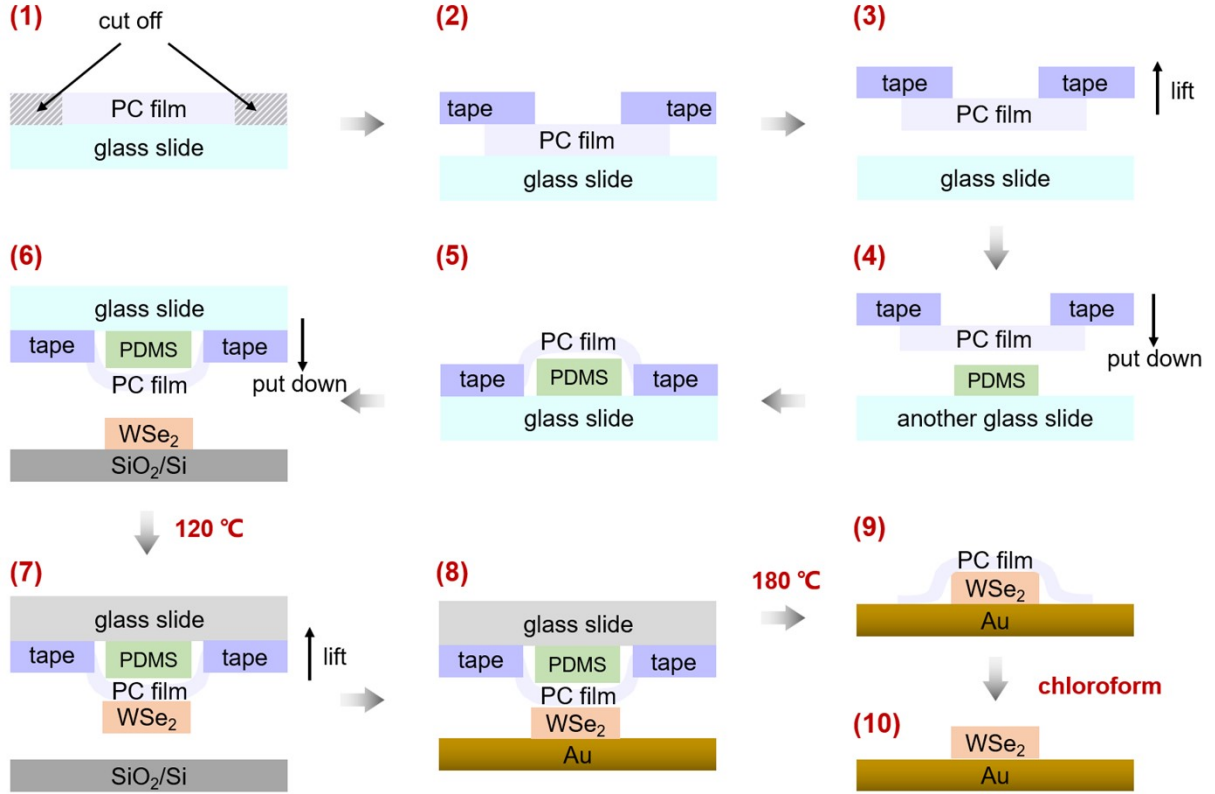

**Fig. S1** Schematic diagram for the fabrication process of a 2D WSe<sub>2</sub> memory cell (see detailed descriptions in the sample preparations section of the main text). Of special note is that the PDMS film used here is pre-cleaned by plasmas to increase the surface viscosity, so that it can be tightly attached to the PC film for the eventual obtainment of a wrinkle-free WSe<sub>2</sub> monolayer. In the plasma-cleaning process, the glass substrate with a PDMS film on top was first placed inside a reaction cavity, which was then pumped to the vacuum with a pressure value of 100 pa. Under the continuous O<sub>2</sub> flow at the speed of 50 mL/min, the plasma generator was started to create a high-voltage AC (alternate-current) field between the two electrodes of the reaction cavity. This electric field could accelerate the free electrons to a high energy, which was sufficient to excite the O<sub>2</sub> molecules for the generation of plasmas. During the 3-5 s cleaning time, the high-energy plasmas reacted with the organic contaminants or collided with the micro-sized particles on the PDMS surface to yield various volatile materials. These volatile materials would be pumped out of the cavity together with the O<sub>2</sub> flow, leaving behind a PDMS film with the high surface cleanness and activity.

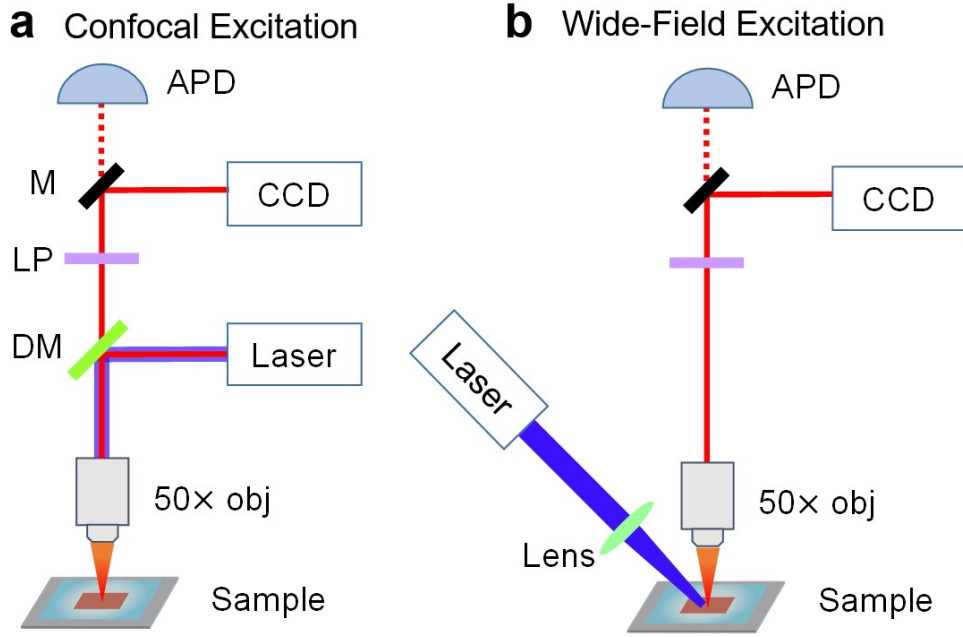

**Fig. S2** Schematic diagrams for the optical measurements of 2D WSe<sub>2</sub> memory cells using the (a) confocal and (b) wide-field setups (see detailed descriptions in the optical measurements section of the main text). APD: avalanche photodetector; M: mirror; CCD: charge-coupled device; LP: long-pass filter; DM: dichroic mirror; obj: objective.

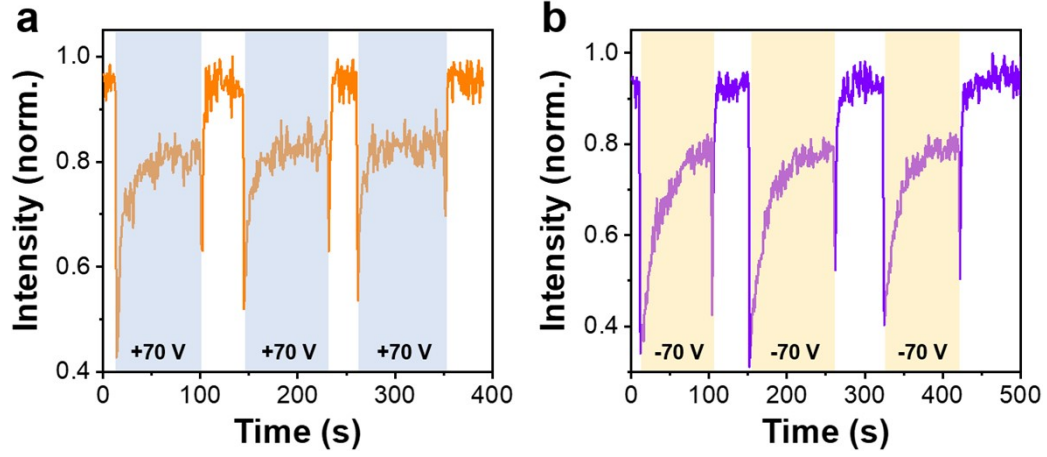

**Fig. S3** Time-dependent PL intensities of WSe<sub>2</sub> measured when the external biases of (a) +70 V and (b) -70 V are first applied to and then removed from the electrode for several times. The PL intensity of WSe<sub>2</sub> stays at almost the same level when there is no external bias on the electrode, showing stable operation of the memory cell during the fast charging and discharging processes.

| Positions | $A_1$ | $\tau_1(\text{ns})$ | $A_2$ | $\tau_2(\text{ns})$ |
|-----------|-------|---------------------|-------|---------------------|
| <b>A</b>  | 1.00  | 0.25                |       |                     |
| <b>B</b>  | 0.77  | 0.43                | 0.23  | 1.45                |
| <b>C</b>  | 0.85  | 0.16                | 0.15  | 0.92                |
| <b>D</b>  | 0.80  | 0.40                | 0.20  | 1.43                |

**Table S1** Fitting parameters for the PL decay curves of monolayer WSe<sub>2</sub>. For position A, the PL decay curve is fitted by a single-exponential function of  $A_1 e^{-t/\tau_1}$ . For positions B-D, the PL decay curves are each fitted by a bi-exponential function of  $A_1 e^{-t/\tau_1} + A_2 e^{-t/\tau_2}$ .

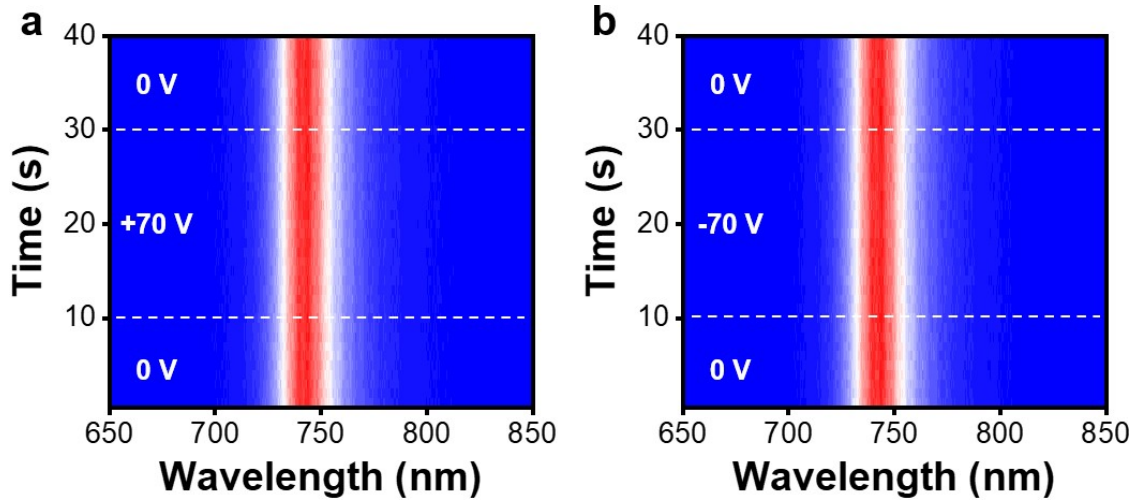

**Fig. S4** Time-dependent PL spectral image measured for monolayer WSe<sub>2</sub> placed between two non-contacting electrodes. (a) A +70 V bias is applied to and then removed from the two electrodes at 10 and 30 s, respectively. (b) A -70 V bias is applied to and then removed from the two electrodes at 10 and 30 s, respectively.

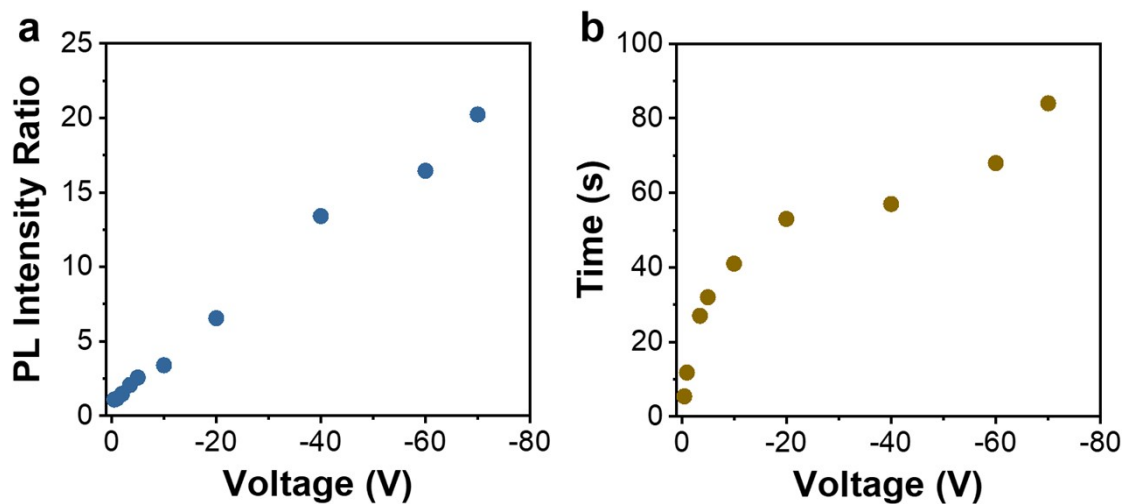

**Fig. S5** (a) The ratio of WSe<sub>2</sub> PL intensities measured before and right after an external bias from -0.5 to -70 V has been applied to the electrode. A larger PL intensity ratio corresponds a more negatively-charged WSe<sub>2</sub> monolayer. (b) Electron retention time measured after an external bias from -0.5 to -70 V has been applied to the electrode.

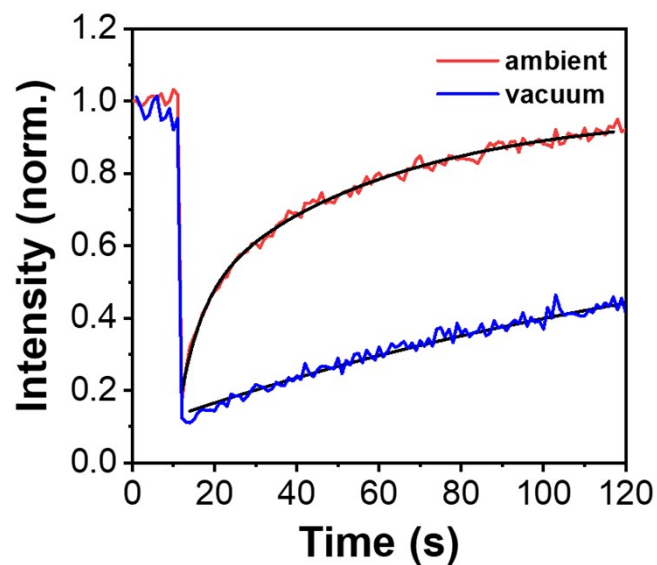

**Fig. S6** Time-dependent PL intensities measured under the ambient and vacuum conditions for the same monolayer WSe<sub>2</sub> before and after an external bias of -10 V is applied to the electrode at 10 s, where the exponential fittings yield the electron retention times of ~27 and ~163 s, respectively. The above measurements are performed at room temperature, with the monolayer WSe<sub>2</sub> being excited at ~30 W/cm<sup>2</sup> by a pulsed 405 nm laser.

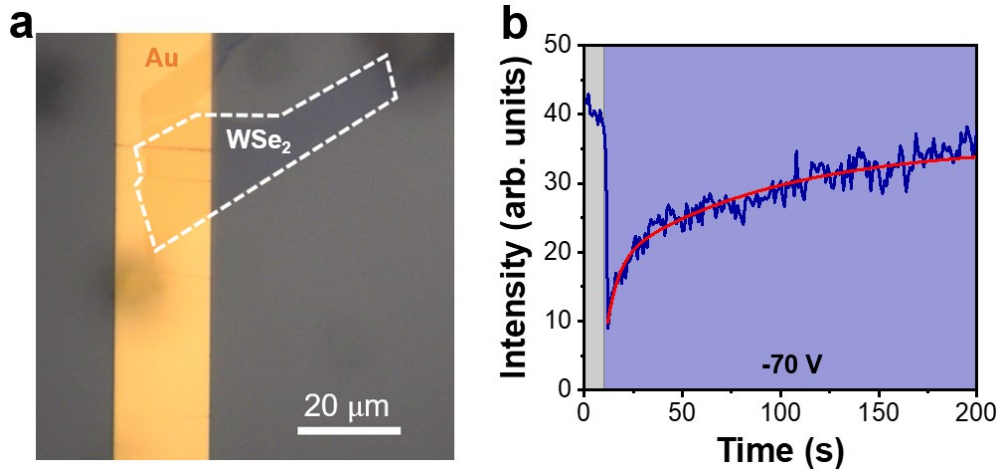

**Fig. S7** (a) Optical image of a memory cell with only one electrode, above which a WSe<sub>2</sub> monolayer is partially deposited to serve as the channel material. (b) Time-dependent PL intensity measured at room temperature for monolayer WSe<sub>2</sub> before and after an external bias of -70 V is applied to the electrode at 10 s. The PL intensity rise curve measured during 10-200 s is exponentially fitted to yield an electron retention time of ~81 s.

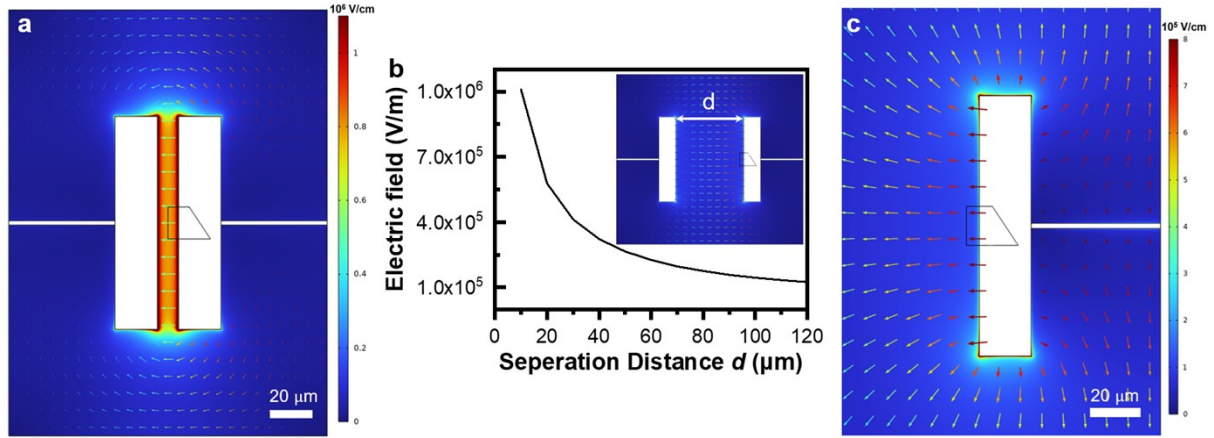

**Fig. S8** (a) Simulated electric-field distribution around the two electrodes (white regions) being grounded (left) and biased at +10 V (right), respectively. The two electrodes are separated by 10 μm, and each of them has the width, length and thickness of 20 μm, 100 μm and 130 nm, respectively. The monolayer WSe<sub>2</sub> (black right-angled trapezoid) is deposited partially on top of the right electrode, while the average electric field estimated within its non-contacting area is  $\sim 1.00 \times 10^6$  V/m. (b) Average electric field simulated within the non-contacting area of monolayer WSe<sub>2</sub> as a function of the separation distance  $d$  between the two electrodes being grounded and biased at +10 V, respectively. Inset: Representative electric-field distribution simulated at  $d = 80$  μm. According to these simulated results, the average electric field starts from  $\sim 10^6$  V/m at  $d = 10$  μm and decreases exponentially with the further increase of  $d$ . However, once  $d$  is larger than  $\sim 100$  μm, this electric field would stay at almost a constant value of  $\sim 10^5$  V/m. (c) Simulated electric-field distribution around the one electrode being biased at +10 V, with the grounded position being set at the source meter used in our experiment. The average electric field estimated within the non-contacting area of monolayer WSe<sub>2</sub> is  $\sim 1.46 \times 10^5$  V/m, which is confirmed by us to have the same charge injection efficiency as that of the  $\sim 10^6$  V/m case (see Figure S7). The above simulations are performed by a finite-element method using the Comsol Multiphysics software.

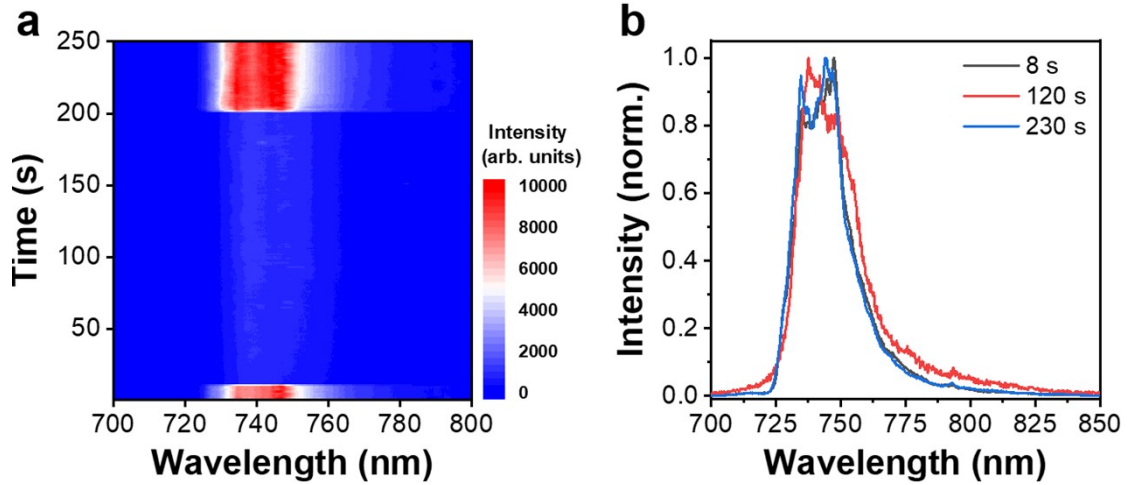

**Fig. S9** (a) Time-dependent PL spectral image measured for monolayer WSe<sub>2</sub> at 4 K, wherein a -70 V bias is first applied to and then removed from the electrode at 10 and 200 s, respectively. (b) PL spectrum extracted from (a) at 120 s (solid red line), showing the emergence of a red-shifted component due to the more negatively-charged condition of monolayer WSe<sub>2</sub>. For comparison, the PL spectra extracted from (a) at 8 (solid black line) and 230 s (solid blue line) are also provided, corresponding to the originally n-doped condition when no external bias is applied to the electrode.

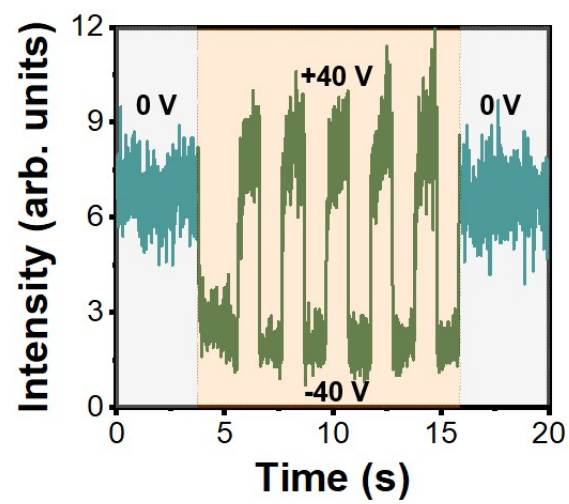

**Fig. S10** Time-dependent PL intensity measured for monolayer WSe<sub>2</sub> under alternating applications of the  $\pm 40$  V biases to the electrode.
